# Supplementary material for: Exploring the protective mechanism of baicalin in treatment of atherosclerosis using endothelial cells degranulation model and network pharmacology
Source: Research Square preprint supplement (doi:10.21203/rs.3.rs-1456635/v1), 2022-03-24
Supplement: Supplementary file 1 [file 0809709705efde05ed3e1022.docx]

TableS1. Common Targets Between baicalin and AS.

| Target | Common Name | Uniprot ID |
| --- | --- | --- |
| C-C motif chemokine ligand 4 | CCL4 | Q8NHW4 |
| Androgen receptor | AR | P10275 |
| Caspase 3 | CASP3 | P70677 |
| Poly (ADP-Ribose) Polymerase 1 | PARP1 | [P09874](https://www.uniprot.org/uniprot/P09874) |
| Tumor Protein p53 | TP53 | P04637 |
| Sirtuin 1 | SIRT1 | Q923E4 |
| Interleukin 1 beta | IL1B | P42701 |
| AKT serine/threonine kinase 1 | AKT1 | P31749 |
| Protein kinase AMP-activated catalytic subunit alpha 2 | PRKAA2 | Q13131 |
| Annexin A5 | ANXA5 | P08758 |
| Basigin (Ok blood group) | BSG | P35613 |
| myeloperoxidase | MPO | P05164 |
| Hypoxia Inducible Factor 1 subunit alpha | HIF1A | Q9NWT6 |
| Matrix Metallopeptidase 3 | MMP3 | P08254 |
| Coagulation factor II thrombin receptor | F2R | P25116 |
| BCL2 apoptosis regulator | BCL2 | P10415 |
| Interleukin 6 | IL6 | P05231 |
| Matrix Metallopeptidase 8 | MMP8 | P22894 |
| Prostaglandin-endoperoxide synthase 2 | PTGS2 | P35354 |
| Aldo-keto reductase family 1 member B | AKR1B1 | P15121 |
| Nitric Oxide Synthase 2 | NOS2 | P35228 |
| Vascular Endothelial Growth Factor A | VEGFA | P15692 |
| PPARG coactivator 1 alpha | PPARGC1A | Q9UBK2 |
| Interferon gamma | IFNG | P01579 |
| C-X-C motif chemokine ligand 12 | CXCL12 | P48061 |
| C-X3-C motif chemokine ligand 1 | CX3CL1 | P49238 |
| MicroRNA 145 | MIR145 | Q7Z5W3 |
| Matrix Metallopeptidase 9 | MMP9 | P14780 |
| Nuclear Factor kappa B subunit 1 | NFKB1 | P19838 |
| Tumor Necrosis Factor | TNF | P01375 |
| Mitogen-Activated Protein Kinase 1 | MAPK1 | P28482 |
| Interleukin 4 | IL4 | P05112 |
| C-C motif chemokine ligand 11 | CCL11 | P51671 |
| Epidermal Growth Factor receptor | EGFR | P00533 |
| Kinase insert Domain Receptor | KDR | P35968 |
| Signal Transducer and Activator of Transcription 3 | STAT3 | P40763 |
| Heme oxygenase 1 | HMOX1 | P09601 |
| telomerase reverse transcriptase | TERT | O14746 |
| Mitogen-Activated Protein Kinase 14 | MAPK14 | Q16539 |
| MYC proto-oncogene, bHLH transcription factor | MYC | P01106 |
| Fos proto-oncogene, AP-1 transcription factor subunit | FOS | P01100 |
| Caspase 1 | CASP1 | P29466 |
| CD44 Molecule | CD44 | P16070 |
| Xanthine Dehydrogenase | XDH | P47989 |
| NADPH Oxidase 4 | NOX4 | Q9NPH5 |
